# Supplementary material for: Placenta-derived SOD3 deletion impairs maternal behavior via alterations in FGF/FGFR-prolactin signaling axis
Source: PubMed Central journal article supplement (PMC11639441; doi:10.1016/j.celrep.2024.114789), 2024-09-25
Supplement: NIHMS2038426-supplement-1.pdf [file NIHMS2038426-supplement-1.pdf]

**Supplemental information**

**Placenta-derived SOD3 deletion  
impairs maternal behavior via alterations  
in FGF/FGFR-prolactin signaling axis**

**Yidan Xu, Ana B. Alves-Wagner, Hitoshi Inada, Sepideh D. Firouzjah, Shion Osana, Muhammad Subhan Amir, Royce H. Conlin, Michael F. Hirshman, Eva S. Nozik, Laurie J. Goodyear, Ryoichi Nagatomi, and Joji Kusuyama**

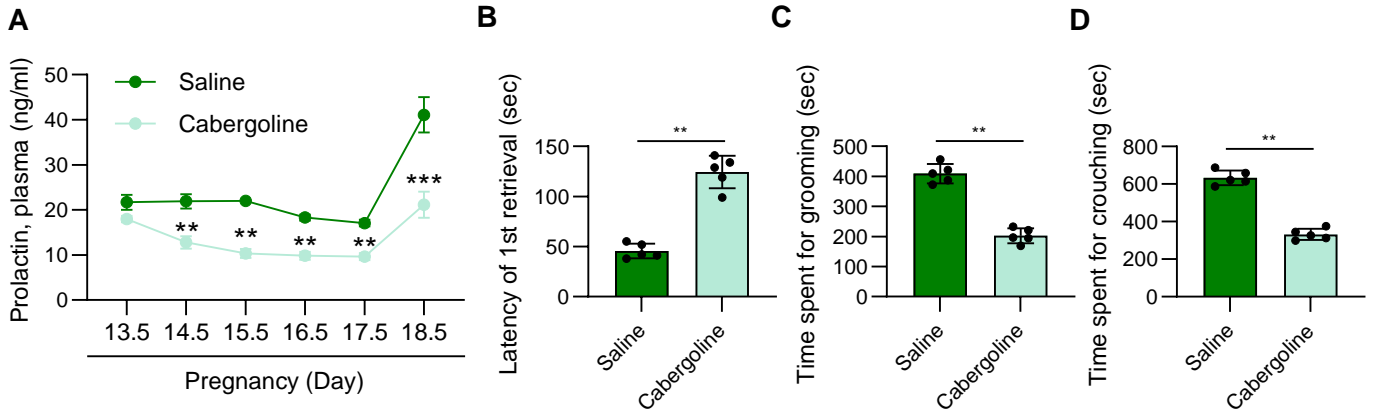

**Supplemental Figure 1: Cabergoline injection inhibits prolactin levels and maternal behavior, Related to Figure 4.** A) Plasma levels of prolactin of daily cabergoline injected dams from day 13.5 to 18.5. B-D) Latency of the first retrieval on day 1 (B), time spent for grooming on day 3 (C), and time spent for crouching on day 1 (D) of daily cabergoline injected dams. (N=5 in each group. Three technical replicates for each group. \*\*P<0.01, \*\*\*P<0.001)

**Supplemental Table 1: List of primer sequences used for genotyping, Related to Figure 1.**

| Gene                      | Forward                    | Reverse                   |
|---------------------------|----------------------------|---------------------------|
| Sod3 flox                 | GATGACCTGGGAACATGATGGAGAGG | GCCTGTTCTGCTAAGCTCTCACAAC |
| Tpbpa/Ada Cre             | CGGTCTCTGAGAGCCATC         | CCCTGAACATGTCCATCA        |
| Tpbpa/Ada Cre for qPCR    | TTCCATATTGCAGAACGAAAACG    | CAGGCTAAGTGCCTTCTCTACA    |
| Internal control for qPCR | TTTAAGTGGCTTGCCATTTCTGG    | TCATCCTACAGTGAAGGATTCAC   |

**Supplemental Table 2: List of primer sequences used for RT-qPCR of mouse and rat samples, Related to Figure 2, 4, 5, 6, 7**

| Gene    | Description                                           | Forward                 | Reverse                 |
|---------|-------------------------------------------------------|-------------------------|-------------------------|
| mAvp    | Arginine vasopressin                                  | GCTACTTCCAGAAGTCCCAAG   | CAGCAGATGCTTGGTCCGAAGC  |
| mAvpr1b | Arginine vasopressin receptor 1B                      | GGCACCTTTCTTCAGTGTCCAG  | GTTGCCCAGAAGCATCGAGATG  |
| mDrd2   | Dopamine receptor D2                                  | CCTGTCCTTACCATCTCTTGC   | TAGACCAGCAGGGTGACGATGA  |
| mFgf1   | Fibroblast growth factor 1                            | CCAAGGAAACGTCCACAGTCAG  | ACGCTGAAGACATCCTGTCTC   |
| mFgf2   | Fibroblast growth factor 2                            | AAGCGGCTCTACTGCAAGAACG  | CCTTGATAGACACAACCTCTCTC |
| mFgfr1  | Fibroblast growth factor receptor 1                   | GCCTCACATTCAGTGGCTGAAG  | AGCACCTCCATTTCTTGTCCGG  |
| mFgfr2  | Fibroblast growth factor receptor 2                   | GTCTCCGAGTATGAGTTGCCAG  | CCACTGCTTCAGCCATGACTAC  |
| mFgfr3  | Fibroblast growth factor receptor 3                   | ACAGGTGGTCATGGCAGAAGCT  | CTCCATCTCAGATACCAGGTCC  |
| mFgfr4  | Fibroblast growth factor receptor 4                   | TCCGACAAGGATTTGGCAGACC  | TGGCGGCACATTCACAATCAC   |
| mIldh1  | Isocitrate dehydrogenase 1                            | CAGGCTCATAGATGACATGGTGG | CACTGGTCATCATGCCAAGGGA  |
| mIldh2  | Isocitrate dehydrogenase 2                            | GGGTGTCAAGTGTGCCACAATC  | TTGGCTCTCTGAAGACGGTTCC  |
| mOxt    | Oxytocin                                              | CTGTGCTGGACCTGGATATGCG  | AGCTCGTCCGCGCAGCAGATG   |
| mOxtr   | Oxytocin receptor                                     | TCATCGTGTGCTGGACGCCTTT  | GCCCGTGAAGAGCATGTAGATC  |
| mPrl    | Prolactin                                             | CTGGCTACACCTGAAGACAAGG  | TCACTCGAGGACTGCACCAAC   |
| mPrlr   | Prolactin receptor                                    | GACCTGCATCTTTCCACCAGTTC | AGAACTCCACCAGCAAGTCCTC  |
| mPrl3b1 | Prolactin family 3, subfamily b, member 1             | AAACAGCGAGCAAGTCCACCAG  | TGCCACCATGTGTTTCAGAGGC  |
| mPrl3d1 | Prolactin family 3, subfamily d, member 1             | CCAGAGAATCGAGAGGAAGTCC  | GTCAGTGCAGACACCAGGTGTT  |
| mPrl3d3 | Prolactin family 3, subfamily d, member 3             | CCAGAGAATCGAGAGGAAGTCC  | TCCTGGAAGAGCAGTCAGTGCA  |
| mSod3   | Superoxide dismutase 3                                | GACCTGGTTGAGAAGATAGGCG  | TGGCTGATGGTTGTACCCTGCA  |
| mTet1   | Ten-eleven translocation methylcytosine dioxygenase 1 | CAGGACCAAGTGTGCTGCTGT   | GACACCCATGAGAGCTTTTCCC  |
| mTet2   | Ten-eleven translocation methylcytosine dioxygenase 2 | ACCTGGCTACTGTCATTGCTCC  | TGCAGTGACTCCTGAGAATGGC  |
| mTh     | Tyrosine hydroxylase                                  | TGCACACAGTACATCCGTCATGC | GCAAATGTGCGGTCAGCCAACA  |
| mZbtb18 | Zinc finger and BTB domain containing 18              | CTGTCAAGTCCAGCCTTTCAGG  | CTCATCACAGGACGCCTCTTTC  |
| rPrl    | Prolactin                                             | GTCAGCCCGAAAGCAGG       | ACCACACGGTCAAACAGCTC    |
| rPrlr   | Prolactin receptor                                    | AATCATCCAGAGAGGGGCTC    | ATCAGAGGCTCCCTTCACAG    |
| rRpl13a | Ribosomal protein L13a                                | GCGGAGGGGCAGGTTCTA      | CTCACAGCGTACAACCACCA    |

**Supplemental Table 3: List of primer sequences used for MSP, Related to Figure 6, 7.**

|         | Target site  |          | Forward                      | Reverse                   |
|---------|--------------|----------|------------------------------|---------------------------|
| Fgfr1   | -308 to -143 | M Primer | GGAAAATCGAGATTTAGAGTAC       | ACGCCCGAATTTCAAACAT       |
|         |              | U Primer | GGGAAAATTGAGATTTAGAGTAT      | AACACCCAAATTTCAAACAT      |
| Fgfr2   | -245 to -90  | M Primer | GTGTATTTTTGCGGGTAGC          | CCGAACCGTTTCCTAAAC        |
|         |              | U Primer | TTTGTGTATTTTTGTTGGGTAGT      | ACCCAAACCATTTCCTAAACA     |
| Fgfr3   | -150 to -64  | M Primer | TCGGTATTGTTTTAAGGGGTC        | CGAACGATCCCAAAAAAC        |
|         |              | U Primer | AGTTTGGTATTGTTTTAAGGGGTT     | CCAAACAATCCCAAAAAACAT     |
| Fgfr4   | -159 to -16  | M Primer | ACGTGGGGTTTCGGAAC            | TCCGAAACCCGACAAATATC      |
|         |              | U Primer | TGGATGTGGGGTTTTGGAAT         | TCCAAAACCAACAATATCAAC     |
| Fgf1    | -933 to -695 | M Primer | TTGGGATATATACGAATACGTATAC    | CATAATTAATTATTTCCGATCG    |
|         |              | U Primer | AGGTTGGGATATATATGAATATGTATAT | AACCATAATTAATTATTTCCAATCA |
| Fgf2    | -154 to -72  | M Primer | AAATTTAGGAGTTGCGTTATC        | CCGACGCCTCCAAATTAC        |
|         |              | U Primer | TTTAAATTTTAGGAGTTGTGTTATT    | CCCAACACCTCCAAATTACAA     |
| Ptp4a1  | -231 to -105 | M Primer | AGGCGTTTTAAGTTGAGGC          | CAAACGTCACTCGAAACAAC      |
|         |              | U Primer | GAGAGGTGTTTTAAGTTGAGGT       | ACACAAACATCACTCAAAACAAC   |
| Gng8    | -685 to -545 | M Primer | AAATTAGTTGCGGGAGGC           | TAAAAAATATCAAACGCGCC      |
|         |              | U Primer | TGAAAATTAGTTGTTGGGAGGT       | CTAAAAAATATCAAACACACCAA   |
| Hspa1b  | -304 to -136 | M Primer | TTTATAGGGATTTGAAAGTTGC       | CGCTCCCTTAAATAATCG        |
|         |              | U Primer | TTATTATAGGGATTTGAAAGTTGT     | CCCCACCTCCCTTAAATAATCA    |
| Crabp2  | -321 to -202 | M Primer | TGAAACGGGATTTGTGGTTC         | GAACCGAAAAACGTCAAAAA      |
|         |              | U Primer | TGGTGAAATGGGATTTGTGTTT       | AAACCAAAAAACATCAAAAAACA   |
| Cyp26b1 | -189 to -44  | M Primer | AGAGTCGAGAGATTGCGTTTC        | AAAACCCCGAACGAACTCT       |
|         |              | U Primer | TTTAGAGTTGAGAGATTGTGTTTT     | AACAAAACCCCAAACTCT        |
| Rab43   | -503 to -362 | M Primer | TAGGGTTACGAAAAGGTGC          | TACGAATTCGCTATCAACAAC     |
|         |              | U Primer | TTTTAGGGTTATGAAAAGGTGT       | TACAAATTCCTATCAACAACACC   |

**Supplemental Table 4: ELISA information, Related to Figure 2, 3, 4, 6, 8.**

| Target             | Sensitivity    | Intra-assay and inter-assay coefficient of variations (CVs) (%) |
|--------------------|----------------|-----------------------------------------------------------------|
| SOD3               | 1.42 ng/mL     | 4.9                                                             |
| Prolactin          | 30 pg/mL       | 3.9                                                             |
| Oxytocin           | 4 pg/mL        | 5.2                                                             |
| Estradiol          | 12.1 pg/mL     | 4.8                                                             |
| Progesterone       | 0.3 ng/mL      | 6.3                                                             |
| Corticosterone     | 0.28 ng/mL     | 6.1                                                             |
| Dopamine           | 25 pg/ml       | 5.1                                                             |
| Placental lactogen | 1 ng/mL        | 8.9                                                             |
| FGF1               | 12.5 pg/mL     | 4.5                                                             |
| FGF2               | 46.9 pg/mL     | 5.2                                                             |
| FGF4               | No information | 5.3                                                             |
| Alpha KG           | 0.01 nmol/well | 4.8                                                             |
| IDH activity       | 0.01 mU/well   | 6.1                                                             |
| TET activity       | 10 ng/well     | 5.3                                                             |
